# Supplementary material for: Cytotaxonomy and Molecular Analyses of Mycteria americana (Ciconiidae: Ciconiiformes): Insights on Stork Phylogeny
Source: MDPI journal article supplement (doi:10.3390/genes14040816), 2023-03-28
Supplement: s1 [file s1]

**Table S1.** Data on the species analyzed in this study, their respective GenBank and/or Boldsystems accession codes.

| Species                              | Cytochrome oxidase I (COI) |                | Cytochrome b (Cytb) |
|--------------------------------------|----------------------------|----------------|---------------------|
|                                      | Genbank                    | Boldsystems    |                     |
| <i>Anastomus oscitans</i>            | KY040008.1                 | -              | -                   |
|                                      | KY040009.1                 | -              | -                   |
| <i>Ciconia abdimii</i>               | KU722448.1                 | GBIR7208-17    | U72774.1            |
|                                      | MT456662.1                 | SIBSI057-19    | -                   |
|                                      | -                          | ROMC112-07     | -                   |
| <i>Ciconia boyciana</i>              | KJ862146.1                 | GBIR9434-19    | AB026193.1          |
|                                      | KJ862145.1                 | GBMIN133497-17 | NC_002196.1         |
|                                      | KJ862153.1                 | GBMIN133504-17 | U72773.1            |
| <i>Ciconia ciconia</i>               | KY754495.1                 | MPBM010-17     | AB026818.1          |
|                                      | NC_002197.1                | GBMTG125-16    | NC_002197.1         |
|                                      | MT773178.1                 | GBMNC107-20    | MN122897.1          |
|                                      | AB026818.1                 | GBMNA11117-19  | KJ456229.1          |
|                                      | AY567881.1                 | GBIR1245-09    | U70822.1            |
|                                      | GU571816.1                 | BISE414-08     | X86744.1            |
|                                      | GU571817.1                 | BISE237-08     | AY567909.1          |
|                                      | MZ050101.1                 | -              | -                   |
|                                      | MZ050102.1                 | -              | -                   |
|                                      | MZ050103.1                 | -              | -                   |
| <i>Ciconia episcopus</i>             | U72775.1                   | -              | -                   |
|                                      | U72785.1                   | -              | -                   |
| <i>Ciconia maguari</i>               | FJ027377.1                 | KAARG268-07    | MN356211.1          |
|                                      | JQ174456.1                 | USNMA390-10    | DQ485896.1          |
|                                      | JQ174457.1                 | USNMA391-10    | U72772.1            |
|                                      | JQ174458.1                 | USNMK269-11    | -                   |
|                                      | JQ174455.1                 | USNMK270-11    | -                   |
|                                      | MN356211.1                 | -              | -                   |
|                                      | -                          | -              | -                   |
|                                      | -                          | -              | -                   |
| <i>Ciconia nigra</i>                 | NC_023946.1                | GBMTG4880-16   | KY767670.1          |
|                                      | KF906246.1                 | GBMNA11115-19  | KF906246.1          |
|                                      | AY660580.1                 | GBIR7379-19    | NC_023946.1         |
|                                      | AY567882.1                 | GBIR1244-09    | MK818509.1          |
|                                      | KY767670.1                 | GBIR10477-19   | U72771.1            |
|                                      | MK818509.1                 | -              | AY567910.1          |
| <i>Ciconia stormi</i>                | -                          | -              | U72776.1            |
| <i>Ephippiorhynchus asiaticus</i>    | -                          | -              | U72782.1            |
|                                      | -                          | -              | U72780.1            |
| <i>Ephippiorhynchus senegalensis</i> | -                          | ROMC242-07     | U72781.1            |

|                                 |             |                |             |
|---------------------------------|-------------|----------------|-------------|
|                                 | -           | ROMC243-07     | KX534432.1  |
| <i>Jabiru mycteria</i>          | JN801320.1  | BOTW286-05     | U72770.1    |
|                                 | JQ175174.1  | USNMI178-11    | U19611.1    |
| <i>Leptoptilos cruminiferus</i> | KJ862147.1  | GBMIN133498-17 | U08950.1    |
|                                 | KJ862148.1  | GBMIN133499-17 | X86754.1    |
|                                 | KJ862149.1  | GBMIN133500-17 | -           |
| <i>Leptoptilos javanicus</i>    | -           | BROMB687-07    | -           |
|                                 | JN709936.1  | -              | -           |
|                                 | ON359972.1  | -              | -           |
| <i>Mycteria americana</i>       | DQ433031.1  | BOTW290-05     | AF082066.2  |
|                                 | DQ433030.1  | BOTW293-05     | DQ485895.1  |
|                                 | FJ027865.1  | KBARG112-07    | U72779.1    |
|                                 | JQ175426.1  | USNMJ268-11    | U08949.1    |
| <i>Mycteria cinerea</i>         | -           | -              | U72778.1    |
| <i>Mycteria ibis</i>            | MF580199.1  | GBMIN134913-17 | U72784.1    |
|                                 | KJ862150.1  | GBMIN133501-17 | -           |
|                                 | KJ862151.1  | GBMIN133502-17 | -           |
|                                 | KJ862152.1  | GBMIN133503-17 | -           |
| <i>Mycteria leucocephala</i>    | KC439344.1  | GBIR5279-13    | KC439298.1  |
|                                 | HM804932.1  | -              | HM804896.1  |
|                                 | HM804933.1  | -              | HM804895.1  |
|                                 | -           | -              | U72777.1    |
|                                 | -           | -              | MH645666.1  |
| <i>Ardea cinerea</i>            | KJ190947.1  | GBMNA11545-19  | KJ190947.1  |
|                                 | NC_025900.1 | GBMTG4795-16   | NC_025900.1 |
| <i>Eudocimus ruber</i>          | KR862292.1  | GBMNA11566-19  | KR862292.1  |
|                                 | NC_027504.1 | GBMTG4604-16   | NC_027504.1 |

No data available = -
